# Supplementary material for: Temporal Dynamics of DNA Methylation Patterns in Response to Rearing Juvenile Steelhead (Oncorhynchus mykiss) in a Hatchery versus Simulated Stream Environment
Source: MDPI journal article supplement (doi:10.3390/genes10050356), 2019-05-09
Supplement: s1 [file s1]

**Figure S1.** Average daily water temperature in the hatchery tanks and simulated stream during the experimental timeframe at Manchester. Prior to 8 August 2014, hatchery fish were reared at the WNFH.

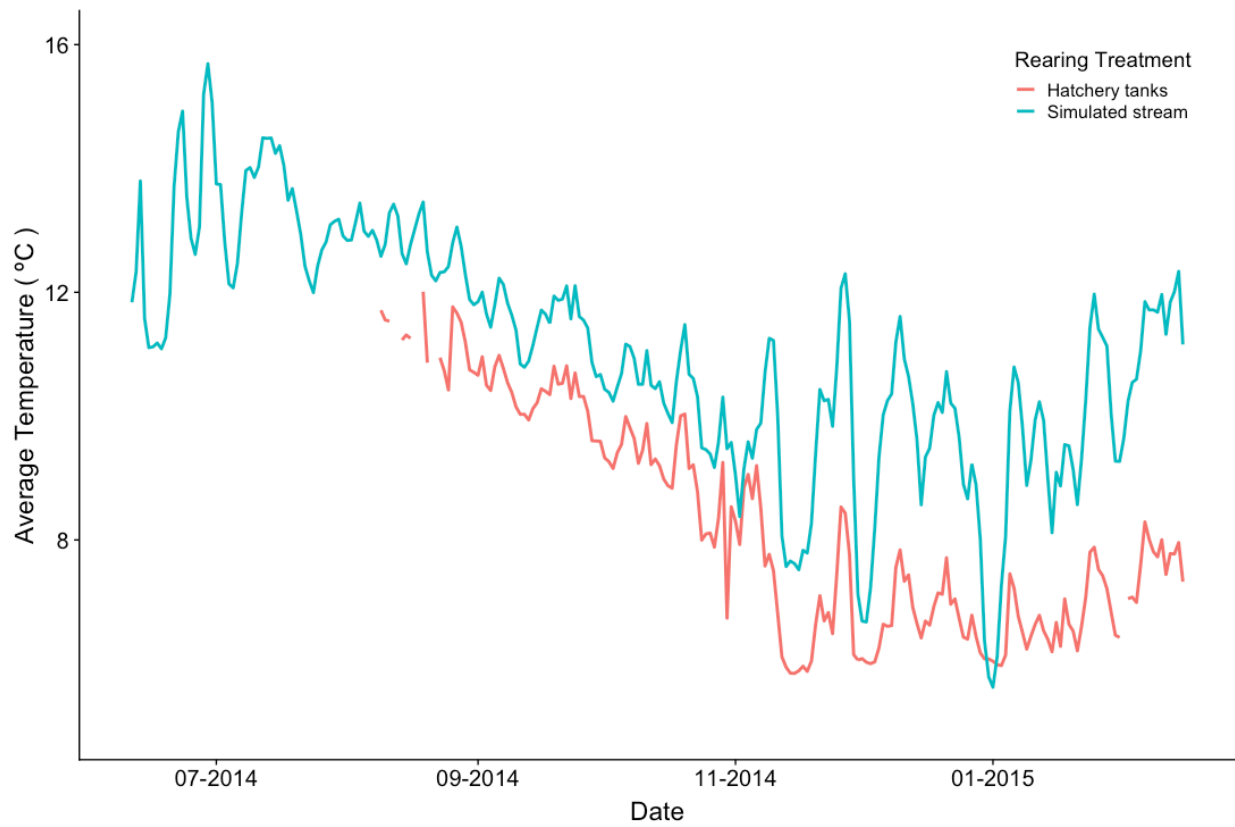

**Figure S2.** Total count and proportion of immature and mature males at age 2 per family separated by rearing treatment.

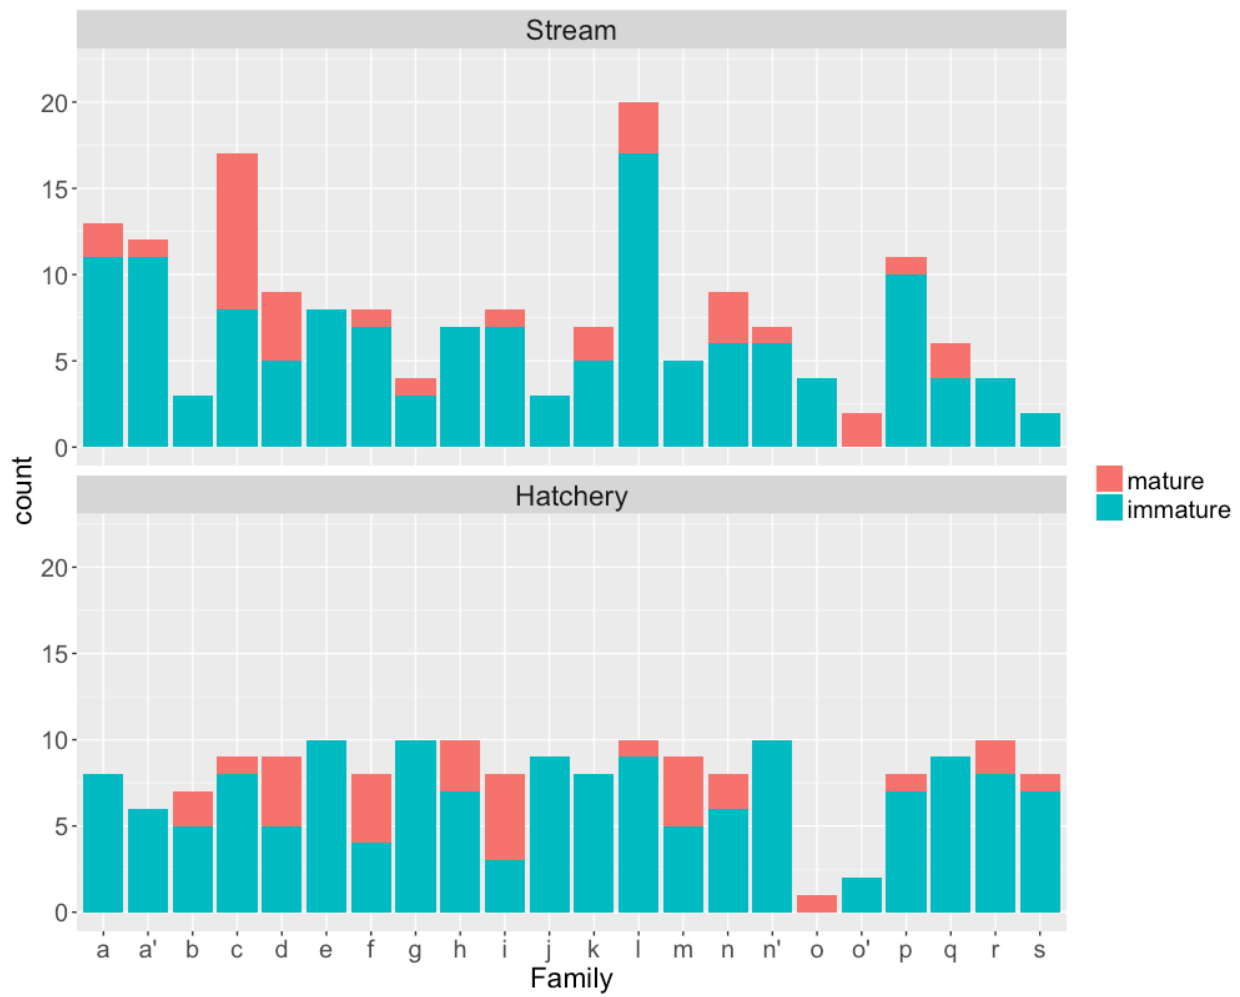

**Figure S3.** Hierarchical clustering of sperm DMCs from the Intergenerational time-point. The rearing-group is identified by color (hatchery = blue, stream = red) at the top of the column. Each row represents a DMC. The heatmap depicts percent methylation for each DMC for each individual with the darkest red indicating 100% methylation and the lightest indicating 0% methylation. The regions that did not meet the coverage cutoff for a particular individual are represented by gray boxes.

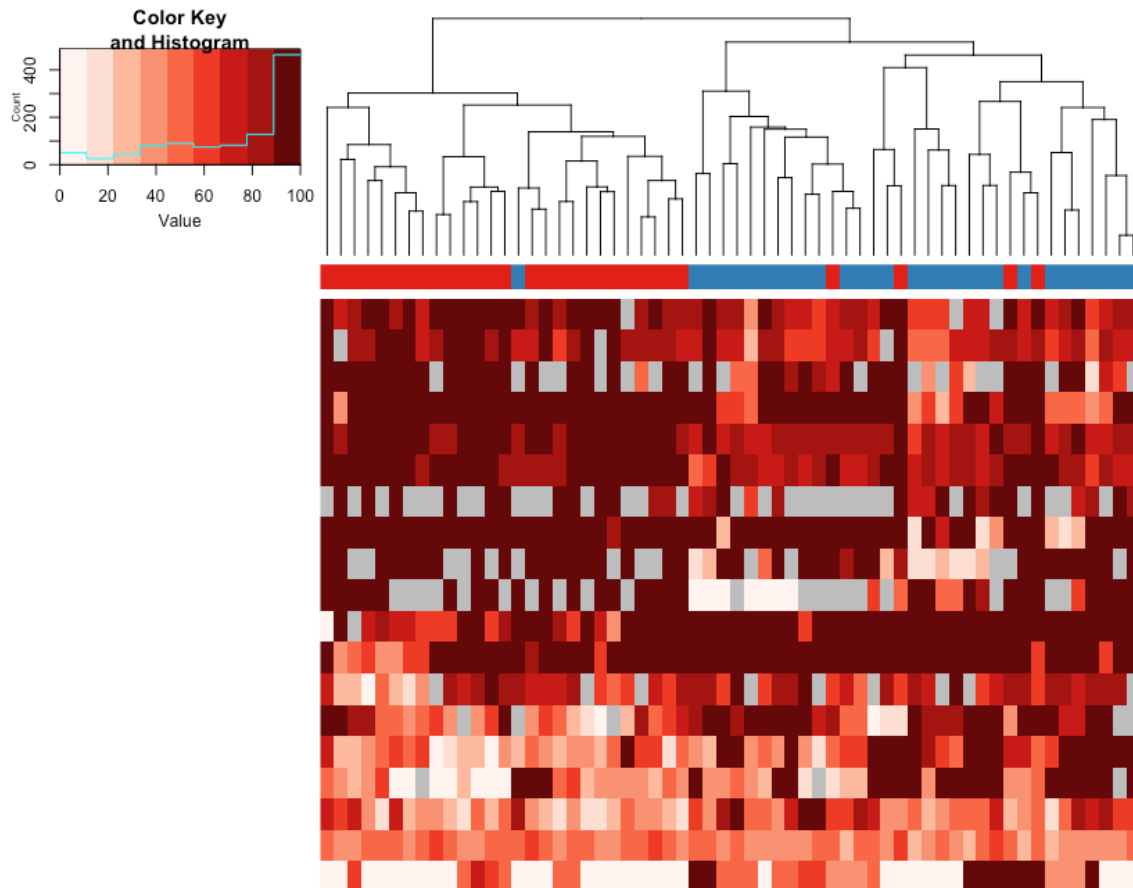

**Table S1.** Enriched canonical pathways for *Immediate* Liver Samples

| <b>Ingenuity Canonical Pathways</b>                        | <b>p-value</b> | <b>Number Molecules</b> |
|------------------------------------------------------------|----------------|-------------------------|
| VDR/RXR Activation                                         | 1.45E-04       | 7                       |
| Nitric Oxide Signaling in the Cardiovascular System        | 4.07E-03       | 7                       |
| CREB Signaling in Neurons                                  | 5.62E-03       | 10                      |
| Calcium-induced T Lymphocyte Apoptosis                     | 6.31E-03       | 4                       |
| TR/RXR Activation                                          | 6.76E-03       | 6                       |
| Heparan Sulfate Biosynthesis (Late Stages)                 | 1.05E-02       | 4                       |
| Role of NFAT in Cardiac Hypertrophy                        | 1.55E-02       | 9                       |
| Heparan Sulfate Biosynthesis                               | 1.74E-02       | 4                       |
| Cellular Effects of Sildenafil (Viagra)                    | 1.95E-02       | 6                       |
| Calcium Signaling                                          | 2.04E-02       | 8                       |
| Neuropathic Pain Signaling In Dorsal Horn Neurons          | 2.19E-02       | 6                       |
| RhoGDI Signaling                                           | 2.29E-02       | 7                       |
| Dermatan Sulfate Biosynthesis (Late Stages)                | 2.40E-02       | 3                       |
| VEGF Family Ligand-Receptor Interactions                   | 2.45E-02       | 5                       |
| Chondroitin Sulfate Biosynthesis (Late Stages)             | 2.63E-02       | 3                       |
| Notch Signaling                                            | 2.63E-02       | 3                       |
| tRNA Splicing                                              | 2.82E-02       | 3                       |
| Huntington's Disease Signaling                             | 2.82E-02       | 9                       |
| G-Protein Coupled Receptor Signaling                       | 2.88E-02       | 10                      |
| PPAR $\alpha$ /RXR $\alpha$ Activation                     | 3.09E-02       | 7                       |
| Ephrin B Signaling                                         | 3.47E-02       | 4                       |
| Epithelial Adherens Junction Signaling                     | 3.72E-02       | 6                       |
| RAR Activation                                             | 3.89E-02       | 7                       |
| Hypoxia Signaling in the Cardiovascular System             | 3.98E-02       | 4                       |
| Role of Oct4 in Mammalian Embryonic Stem Cell Pluripotency | 4.27E-02       | 3                       |
| Chondroitin Sulfate Biosynthesis                           | 4.57E-02       | 3                       |
| EGF Signaling                                              | 4.57E-02       | 4                       |
| Sperm Motility                                             | 4.68E-02       | 5                       |
| Gustation Pathway                                          | 5.01E-02       | 5                       |
| Fc Epsilon RI Signaling                                    | 5.13E-02       | 5                       |
| Dermatan Sulfate Biosynthesis                              | 5.50E-02       | 3                       |

**Table S2.** Enriched canonical pathways for *Persistent* Liver Samples

| <b>Ingenuity Canonical Pathways</b>               | <b>p-value</b> | <b>Number molecules</b> |
|---------------------------------------------------|----------------|-------------------------|
| CREB Signaling in Neurons                         | 2.88E-03       | 10                      |
| PI3K Signaling in B Lymphocytes                   | 4.47E-03       | 7                       |
| Synaptic Long Term Depression                     | 8.51E-03       | 8                       |
| Axonal Guidance Signaling                         | 8.51E-03       | 15                      |
| Chronic Myeloid Leukemia Signaling                | 1.12E-02       | 6                       |
| Glutamate Receptor Signaling                      | 1.20E-02       | 4                       |
| Calcium Signaling                                 | 1.23E-02       | 8                       |
| Neuropathic Pain Signaling In Dorsal Horn Neurons | 1.45E-02       | 6                       |
| GABA Receptor Signaling                           | 1.55E-02       | 5                       |
| Melatonin Signaling                               | 2.57E-02       | 4                       |
| Gα12/13 Signaling                                 | 2.95E-02       | 6                       |
| Semaphorin Signaling in Neurons                   | 4.07E-02       | 3                       |
| Bladder Cancer Signaling                          | 5.25E-02       | 4                       |
| Synaptic Long Term Potentiation                   | 5.25E-02       | 5                       |

**Table S3.** Overlapping DMC between *Immediate* and *Persistent* sample contrasts

| Persistent_DMC_ID    | Immediate_DMC_ID     | Distance<br>Between<br>DMCs<br>(bp) | geneID    | geneID   | gene_desc                            | meth_diff_<br>persistent | meth_diff_<br>immediate |
|----------------------|----------------------|-------------------------------------|-----------|----------|--------------------------------------|--------------------------|-------------------------|
| NC_035090.1.51479257 | NC_035090.1.51475970 | 3286                                | gene26690 | Q13474.2 | Dystrophin-related<br>protein 2      | -33.6                    | -22.9                   |
| NC_035078.1.72178978 | NC_035078.1.72176787 | 2190                                | .         | .        | .                                    | 25                       | -13.6                   |
| NC_035079.1          | NC_035079.1.37901381 | 1121                                | gene5142  | P17247.1 | Transforming growth<br>factor beta-2 | 9.9                      | -21.3                   |
| NC_035100.1          | NC_035100.1.16398197 | 217                                 | .         | .        | .                                    | 18.4                     | -25.7                   |
| NC_035101.1          | NC_035101.1.25373589 | 60                                  | .         | .        | .                                    | -36.6                    | 37.9                    |
| NC_035104.1.20809908 | NC_035104.1.20809908 | 0                                   | .         | .        | .                                    | 19.7                     | -17.1                   |
| NC_035083.1.30499549 | NC_035083.1.30506977 | 7427                                | gene12587 | Q8QHJ9.2 | Interleukin-17<br>receptor D         | -31.6                    | 17.4                    |

**Table S4.** Enriched canonical pathways for Developmental Liver Samples

| <b>Ingenuity Canonical Pathways</b>                         | <b>p-value</b> | <b>Number Molecules</b> |
|-------------------------------------------------------------|----------------|-------------------------|
| Axonal Guidance Signaling                                   | 6.31E-11       | 266                     |
| CREB Signaling in Neurons                                   | 2.40E-10       | 138                     |
| Role of NFAT in Cardiac Hypertrophy                         | 3.55E-10       | 137                     |
| G-Protein Coupled Receptor Signaling                        | 1.23E-09       | 169                     |
| GNRH Signaling                                              | 3.24E-08       | 107                     |
| Netrin Signaling                                            | 5.75E-08       | 49                      |
| Molecular Mechanisms of Cancer                              | 7.08E-08       | 217                     |
| Opioid Signaling Pathway                                    | 8.51E-08       | 142                     |
| Neuropathic Pain Signaling In Dorsal Horn Neurons           | 1.48E-07       | 80                      |
| PPAR $\alpha$ /RXR $\alpha$ Activation                      | 2.82E-07       | 104                     |
| cAMP-mediated signaling                                     | 2.82E-07       | 128                     |
| Synaptic Long Term Depression                               | 3.31E-07       | 109                     |
| Adrenomedullin signaling pathway                            | 6.46E-07       | 119                     |
| nNOS Signaling in Skeletal Muscle Cells                     | 1.00E-06       | 32                      |
| GPCR-Mediated Nutrient Sensing in Enteroendocrine Cells     | 1.51E-06       | 70                      |
| G Beta Gamma Signaling                                      | 1.70E-06       | 77                      |
| Hepatic Fibrosis / Hepatic Stellate Cell Activation         | 1.70E-06       | 95                      |
| Leukocyte Extravasation Signaling                           | 2.00E-06       | 113                     |
| Synaptic Long Term Potentiation                             | 2.34E-06       | 79                      |
| Protein Kinase A Signaling                                  | 3.24E-06       | 194                     |
| Dopamine-DARPP32 Feedback in cAMP Signaling                 | 4.37E-06       | 95                      |
| Regulation of the Epithelial-Mesenchymal Transition Pathway | 5.89E-06       | 116                     |
| PTEN Signaling                                              | 6.61E-06       | 79                      |
| GABA Receptor Signaling                                     | 6.92E-06       | 59                      |
| Corticotropin Releasing Hormone Signaling                   | 6.92E-06       | 87                      |
| Neuregulin Signaling                                        | 8.13E-06       | 63                      |
| Signaling by Rho Family GTPases                             | 8.51E-06       | 137                     |
| Cellular Effects of Sildenafil (Viagra)                     | 9.33E-06       | 74                      |
| RAR Activation                                              | 1.05E-05       | 104                     |
| Glutamate Receptor Signaling                                | 1.12E-05       | 39                      |
| GP6 Signaling Pathway                                       | 1.12E-05       | 83                      |
| IGF-1 Signaling                                             | 1.17E-05       | 72                      |
| Colorectal Cancer Metastasis Signaling                      | 1.17E-05       | 137                     |
| Tight Junction Signaling                                    | 1.32E-05       | 93                      |
| Factors Promoting Cardiogenesis in Vertebrates              | 1.58E-05       | 57                      |
| p70S6K Signaling                                            | 1.78E-05       | 83                      |
| IL-7 Signaling Pathway                                      | 2.00E-05       | 55                      |
| ErbB Signaling                                              | 2.14E-05       | 69                      |
| Cardiac Hypertrophy Signaling                               | 2.14E-05       | 130                     |

|                                                                                |          |     |
|--------------------------------------------------------------------------------|----------|-----|
| Nitric Oxide Signaling in the Cardiovascular System                            | 2.45E-05 | 70  |
| Calcium Signaling                                                              | 3.31E-05 | 109 |
| Gustation Pathway                                                              | 3.55E-05 | 69  |
| Melatonin Signaling                                                            | 3.80E-05 | 46  |
| Ephrin Receptor Signaling                                                      | 3.89E-05 | 101 |
| Role of Osteoblasts, Osteoclasts and Chondrocytes in Rheumatoid Arthritis      | 3.89E-05 | 117 |
| Gap Junction Signaling                                                         | 4.57E-05 | 114 |
| Gai Signaling                                                                  | 5.13E-05 | 72  |
| Type II Diabetes Mellitus Signaling                                            | 5.25E-05 | 90  |
| Neuroinflammation Signaling Pathway                                            | 5.75E-05 | 137 |
| Epithelial Adherens Junction Signaling                                         | 5.89E-05 | 82  |
| Human Embryonic Stem Cell Pluripotency                                         | 7.08E-05 | 84  |
| IL-8 Signaling                                                                 | 7.08E-05 | 110 |
| Sperm Motility                                                                 | 7.24E-05 | 67  |
| Apelin Cardiomyocyte Signaling Pathway                                         | 7.24E-05 | 71  |
| FGF Signaling                                                                  | 7.94E-05 | 60  |
| Agrin Interactions at Neuromuscular Junction                                   | 8.91E-05 | 47  |
| Amyotrophic Lateral Sclerosis Signaling                                        | 1.02E-04 | 70  |
| Role of Macrophages, Fibroblasts and Endothelial Cells in Rheumatoid Arthritis | 1.26E-04 | 150 |
| Renin-Angiotensin Signaling                                                    | 1.32E-04 | 77  |
| Wnt/ $\beta$ -catenin Signaling                                                | 1.45E-04 | 88  |
| CCR5 Signaling in Macrophages                                                  | 1.51E-04 | 50  |
| Endothelin-1 Signaling                                                         | 1.70E-04 | 108 |
| Ephrin A Signaling                                                             | 1.78E-04 | 41  |
| Apelin Endothelial Signaling Pathway                                           | 1.82E-04 | 76  |
| B Cell Receptor Signaling                                                      | 2.24E-04 | 101 |
| Melanocyte Development and Pigmentation Signaling                              | 2.29E-04 | 65  |
| Rac Signaling                                                                  | 2.45E-04 | 75  |
| P2Y Purigenic Receptor Signaling Pathway                                       | 2.45E-04 | 80  |
| STAT3 Pathway                                                                  | 2.88E-04 | 72  |
| Cardiac $\beta$ -adrenergic Signaling                                          | 2.88E-04 | 72  |
| FcyRIIB Signaling in B Lymphocytes                                             | 3.02E-04 | 55  |
| Osteoarthritis Pathway                                                         | 3.24E-04 | 102 |
| Sertoli Cell-Sertoli Cell Junction Signaling                                   | 3.31E-04 | 96  |
| Ceramide Signaling                                                             | 3.72E-04 | 61  |
| ERK/MAPK Signaling                                                             | 3.80E-04 | 105 |
| Endocannabinoid Developing Neuron Pathway                                      | 3.89E-04 | 76  |
| Thrombin Signaling                                                             | 4.27E-04 | 115 |
| RhoGDI Signaling                                                               | 4.37E-04 | 89  |
| PI3K Signaling in B Lymphocytes                                                | 4.57E-04 | 73  |
| iCOS-iCOSL Signaling in T Helper Cells                                         | 4.68E-04 | 59  |
| EGF Signaling                                                                  | 4.79E-04 | 47  |
| Gas Signaling                                                                  | 5.13E-04 | 60  |



|                                                                                 |          |     |
|---------------------------------------------------------------------------------|----------|-----|
| IL-3 Signaling                                                                  | 5.37E-04 | 56  |
| FAK Signaling                                                                   | 5.37E-04 | 65  |
| VDR/RXR Activation                                                              | 5.75E-04 | 41  |
| PI3K/AKT Signaling                                                              | 5.75E-04 | 71  |
| PKC $\theta$ Signaling in T Lymphocytes                                         | 6.17E-04 | 83  |
| Non-Small Cell Lung Cancer Signaling                                            | 6.76E-04 | 54  |
| VEGF Signaling                                                                  | 7.24E-04 | 64  |
| BMP signaling pathway                                                           | 7.76E-04 | 47  |
| Androgen Signaling                                                              | 8.32E-04 | 71  |
| Actin Cytoskeleton Signaling                                                    | 8.32E-04 | 119 |
| Leptin Signaling in Obesity                                                     | 9.55E-04 | 53  |
| GPCR-Mediated Integration of Enteroendocrine Signaling Exemplified by an L Cell | 9.77E-04 | 41  |
| G $\alpha$ q Signaling                                                          | 9.77E-04 | 86  |
| Role of NANOG in Mammalian Embryonic Stem Cell Pluripotency                     | 1.00E-03 | 74  |
| Germ Cell-Sertoli Cell Junction Signaling                                       | 1.07E-03 | 95  |
| Th1 and Th2 Activation Pathway                                                  | 1.12E-03 | 70  |
| AMPK Signaling                                                                  | 1.23E-03 | 115 |
| Integrin Signaling                                                              | 1.23E-03 | 115 |
| GDNF Family Ligand-Receptor Interactions                                        | 1.32E-03 | 52  |
| Insulin Receptor Signaling                                                      | 1.32E-03 | 79  |
| Fc $\gamma$ Receptor-mediated Phagocytosis in Macrophages and Monocytes         | 1.45E-03 | 53  |
| Acute Myeloid Leukemia Signaling                                                | 1.48E-03 | 58  |
| Paxillin Signaling                                                              | 1.48E-03 | 69  |
| HIPPO signaling                                                                 | 1.55E-03 | 49  |
| HGF Signaling                                                                   | 1.58E-03 | 70  |
| Pancreatic Adenocarcinoma Signaling                                             | 1.66E-03 | 71  |
| TR/RXR Activation                                                               | 1.70E-03 | 55  |
| CXCR4 Signaling                                                                 | 1.70E-03 | 92  |
| Role of Tissue Factor in Cancer                                                 | 1.74E-03 | 72  |
| Phagosome Formation                                                             | 1.95E-03 | 62  |
| Dendritic Cell Maturation                                                       | 1.95E-03 | 74  |
| ErbB2-ErbB3 Signaling                                                           | 2.14E-03 | 48  |
| HER-2 Signaling in Breast Cancer                                                | 2.14E-03 | 58  |
| TGF- $\beta$ Signaling                                                          | 2.19E-03 | 53  |
| T Cell Exhaustion Signaling Pathway                                             | 2.24E-03 | 77  |
| CDK5 Signaling                                                                  | 2.29E-03 | 59  |
| Virus Entry via Endocytic Pathways                                              | 2.34E-03 | 65  |
| Circadian Rhythm Signaling                                                      | 2.45E-03 | 23  |
| UVA-Induced MAPK Signaling                                                      | 2.45E-03 | 66  |
| G $\alpha$ 12/13 Signaling                                                      | 2.45E-03 | 79  |
| Erythropoietin Signaling                                                        | 2.51E-03 | 55  |
| ILK Signaling                                                                   | 2.57E-03 | 96  |
| Role of Wnt/GSK-3 $\beta$ Signaling in the Pathogenesis of Influenza            | 2.63E-03 | 37  |

|                                                  |          |     |
|--------------------------------------------------|----------|-----|
| Reelin Signaling in Neurons                      | 2.69E-03 | 56  |
| Angiopoietin Signaling                           | 2.75E-03 | 51  |
| Basal Cell Carcinoma Signaling                   | 2.88E-03 | 42  |
| Breast Cancer Regulation by Stathmin1            | 2.88E-03 | 110 |
| Relaxin Signaling                                | 3.16E-03 | 86  |
| ErbB4 Signaling                                  | 3.24E-03 | 48  |
| IL-12 Signaling and Production in Macrophages    | 3.24E-03 | 65  |
| Mouse Embryonic Stem Cell Pluripotency           | 3.24E-03 | 65  |
| CCR3 Signaling in Eosinophils                    | 3.55E-03 | 67  |
| FAT10 Cancer Signaling Pathway                   | 3.63E-03 | 28  |
| Apelin Pancreas Signaling Pathway                | 3.80E-03 | 36  |
| IL-17A Signaling in Airway Cells                 | 3.80E-03 | 45  |
| PAK Signaling                                    | 3.80E-03 | 62  |
| fMLP Signaling in Neutrophils                    | 3.89E-03 | 69  |
| 14-3-3-mediated Signaling                        | 3.89E-03 | 76  |
| UVB-Induced MAPK Signaling                       | 4.07E-03 | 41  |
| NGF Signaling                                    | 4.27E-03 | 71  |
| Wnt/Ca <sup>+</sup> pathway                      | 4.68E-03 | 38  |
| IL-6 Signaling                                   | 4.68E-03 | 66  |
| Dermatan Sulfate Biosynthesis                    | 4.79E-03 | 30  |
| Dermatan Sulfate Biosynthesis (Late Stages)      | 4.90E-03 | 23  |
| Endocannabinoid Cancer Inhibition Pathway        | 5.01E-03 | 84  |
| NF-κB Activation by Viruses                      | 5.13E-03 | 55  |
| PXR/RXR Activation                               | 5.50E-03 | 31  |
| FLT3 Signaling in Hematopoietic Progenitor Cells | 5.75E-03 | 51  |
| Th2 Pathway                                      | 5.75E-03 | 57  |
| T Cell Receptor Signaling                        | 6.03E-03 | 58  |
| HMGB1 Signaling                                  | 6.03E-03 | 65  |
| Sonic Hedgehog Signaling                         | 6.17E-03 | 18  |
| Chondroitin Sulfate Biosynthesis                 | 6.17E-03 | 28  |
| IL-15 Signaling                                  | 6.46E-03 | 47  |
| IL-4 Signaling                                   | 6.76E-03 | 48  |
| JAK/Stat Signaling                               | 6.76E-03 | 54  |
| Phototransduction Pathway                        | 7.08E-03 | 29  |
| Neurotrophin/TRK Signaling                       | 7.24E-03 | 49  |
| Chronic Myeloid Leukemia Signaling               | 7.41E-03 | 63  |
| Ovarian Cancer Signaling                         | 7.76E-03 | 81  |
| Glioblastoma Multiforme Signaling                | 7.94E-03 | 92  |
| CNTF Signaling                                   | 8.32E-03 | 40  |
| Xenobiotic Metabolism Signaling                  | 8.51E-03 | 124 |
| Cholecystokinin/Gastrin-mediated Signaling       | 8.91E-03 | 53  |
| Prolactin Signaling                              | 8.91E-03 | 53  |
| Macropinocytosis Signaling                       | 8.91E-03 | 53  |
| Hepatic Cholestasis                              | 8.91E-03 | 68  |

|                                                                       |          |    |
|-----------------------------------------------------------------------|----------|----|
| LPS-stimulated MAPK Signaling                                         | 9.33E-03 | 54 |
| $\alpha$ -Adrenergic Signaling                                        | 9.55E-03 | 48 |
| Production of Nitric Oxide and Reactive Oxygen Species in Macrophages | 9.77E-03 | 92 |
| Regulation of IL-2 Expression in Activated and Anergic T Lymphocytes  | 1.02E-02 | 43 |
| Endometrial Cancer Signaling                                          | 1.07E-02 | 44 |
| p38 MAPK Signaling                                                    | 1.07E-02 | 50 |
| VEGF Family Ligand-Receptor Interactions                              | 1.12E-02 | 51 |
| Myc Mediated Apoptosis Signaling                                      | 1.15E-02 | 45 |
| Chemokine Signaling                                                   | 1.20E-02 | 40 |
| GM-CSF Signaling                                                      | 1.20E-02 | 46 |
| IL-15 Production                                                      | 1.23E-02 | 15 |
| Interferon Signaling                                                  | 1.23E-02 | 15 |
| Role of NFAT in Regulation of the Immune Response                     | 1.26E-02 | 82 |
| HIF1 $\alpha$ Signaling                                               | 1.29E-02 | 63 |
| Clathrin-mediated Endocytosis Signaling                               | 1.29E-02 | 95 |
| Docosahexaenoic Acid (DHA) Signaling                                  | 1.38E-02 | 31 |
| Renal Cell Carcinoma Signaling                                        | 1.38E-02 | 49 |
| Th1 Pathway                                                           | 1.38E-02 | 49 |
| Prostate Cancer Signaling                                             | 1.41E-02 | 57 |
| eNOS Signaling                                                        | 1.41E-02 | 87 |
| SPINK1 General Cancer Pathway                                         | 1.45E-02 | 37 |
| Natural Killer Cell Signaling                                         | 1.45E-02 | 58 |
| RhoA Signaling                                                        | 1.55E-02 | 60 |
| Amyloid Processing                                                    | 1.62E-02 | 28 |
| Cancer Drug Resistance By Drug Efflux                                 | 1.62E-02 | 28 |
| Ephrin B Signaling                                                    | 1.62E-02 | 39 |
| Granulocyte Adhesion and Diapedesis                                   | 1.70E-02 | 54 |
| IL-17 Signaling                                                       | 1.74E-02 | 47 |
| Growth Hormone Signaling                                              | 1.82E-02 | 48 |
| RANK Signaling in Osteoclasts                                         | 1.86E-02 | 57 |
| Glioma Signaling                                                      | 1.86E-02 | 67 |
| UVC-Induced MAPK Signaling                                            | 1.91E-02 | 30 |
| Inhibition of Angiogenesis by TSP1                                    | 1.95E-02 | 21 |
| CD28 Signaling in T Helper Cells                                      | 1.95E-02 | 59 |
| Role of IL-17A in Arthritis                                           | 2.04E-02 | 37 |
| Chondroitin Sulfate Biosynthesis (Late Stages)                        | 2.19E-02 | 22 |
| Heparan Sulfate Biosynthesis                                          | 2.19E-02 | 32 |
| nNOS Signaling in Neurons                                             | 2.24E-02 | 27 |
| Dopamine Receptor Signaling                                           | 2.29E-02 | 39 |
| MSP-RON Signaling Pathway                                             | 2.34E-02 | 33 |
| Role of JAK family kinases in IL-6-type Cytokine Signaling            | 2.45E-02 | 15 |
| Apelin Cardiac Fibroblast Signaling Pathway                           | 2.51E-02 | 12 |
| Role of MAPK Signaling in the Pathogenesis of Influenza               | 2.57E-02 | 35 |

|                                                             |          |     |
|-------------------------------------------------------------|----------|-----|
| PCP pathway                                                 | 2.57E-02 | 35  |
| Thrombopoietin Signaling                                    | 2.57E-02 | 42  |
| Prostanoid Biosynthesis                                     | 2.63E-02 | 7   |
| Glucocorticoid Receptor Signaling                           | 2.88E-02 | 127 |
| PDGF Signaling                                              | 2.95E-02 | 55  |
| Fc Epsilon RI Signaling                                     | 3.16E-02 | 59  |
| IL-2 Signaling                                              | 3.24E-02 | 40  |
| Small Cell Lung Cancer Signaling                            | 3.24E-02 | 49  |
| D-myo-inositol (1,4,5)-Trisphosphate Biosynthesis           | 3.31E-02 | 17  |
| Semaphorin Signaling in Neurons                             | 3.31E-02 | 27  |
| Remodeling of Epithelial Adherens Junctions                 | 3.31E-02 | 33  |
| Sphingosine-1-phosphate Signaling                           | 3.47E-02 | 64  |
| Tec Kinase Signaling                                        | 3.47E-02 | 78  |
| Phospholipase C Signaling                                   | 3.47E-02 | 100 |
| Eicosanoid Signaling                                        | 3.55E-02 | 28  |
| PEDF Signaling                                              | 3.55E-02 | 53  |
| Role of PI3K/AKT Signaling in the Pathogenesis of Influenza | 3.63E-02 | 35  |
| Melanoma Signaling                                          | 3.72E-02 | 36  |
| TREM1 Signaling                                             | 3.80E-02 | 29  |
| SAPK/JNK Signaling                                          | 3.89E-02 | 57  |
| Calcium-induced T Lymphocyte Apoptosis                      | 3.98E-02 | 24  |
| PPAR Signaling                                              | 3.98E-02 | 47  |
| Role of JAK1, JAK2 and TYK2 in Interferon Signaling         | 4.07E-02 | 11  |
| Role of JAK2 in Hormone-like Cytokine Signaling             | 4.07E-02 | 19  |
| Superpathway of Inositol Phosphate Compounds                | 4.27E-02 | 109 |
| Regulation of Cellular Mechanics by Calpain Protease        | 4.68E-02 | 34  |
| Notch Signaling                                             | 4.79E-02 | 21  |
| Heparan Sulfate Biosynthesis (Late Stages)                  | 4.79E-02 | 27  |
| Agranulocyte Adhesion and Diapedesis                        | 4.79E-02 | 56  |
| Antioxidant Action of Vitamin C                             | 5.13E-02 | 47  |
| NF-κB Signaling                                             | 5.13E-02 | 83  |
